# Supplementary material for: In Vitro Evaluation of the PMN Reaction on a Collagen-Based Purified Reconstituted Bilayer Matrix (PRBM) Using the Autologous Blood Concentrate PRF
Source: MDPI journal article supplement (doi:10.3390/biomedicines13051239), 2025-05-20
Supplement: s1 [file biomedicines-3615039-supplementary.pdf › biomedicines-3615039-supplementary.pdf]

A

| CYTOKINE | D1     | D2     | D3      | D4      | D5      | D6      | D7      | D8     | D9     | MW      | SD     |
|----------|--------|--------|---------|---------|---------|---------|---------|--------|--------|---------|--------|
| ELA      | 619,63 | 953,69 | 1020,63 | 1246,03 | 1240,86 | 1260,59 | 1120,24 | 957,57 | 873,17 | 1032,49 | 211,11 |
| TGF      | 287,21 | 300,78 | 282,52  | 344,85  | 357,06  | 357,45  | 381,31  | 370,91 | 395,85 | 341,99  | 41,82  |
| IL10     | 64,24  | 67,86  | 61,51   | 55,18   | 55,04   | 53,92   | 59,51   | 63,74  | 64,31  | 60,59   | 4,9    |
| IL4      | 91,95  | 91,67  | 91,19   | 91,50   | 90,37   | 91,92   | 88,14   | 91,09  | 89,23  | 90,78   | 1,31   |
| VEGF     | 18,62  | 18,45  | 18,09   | 18,22   | 17,97   | 17,96   | 12,84   | 14,81  | 16,72  | 17,07   | 1,98   |
| TNF      | 278,99 | 275,77 | 281,20  | 169,75  | 167,35  | 167,14  | 110,98  | 142,23 | 130,12 | 191,50  | 68,12  |
| IL15     | 26,96  | 26,55  | 26,54   | 26,76   | 27,14   | 27,41   | 28,52   | 27,11  | 26,62  | 27,06   | 0,62   |
| IL1      | 210,92 | 224,50 | 224,71  | 45,89   | 44,72   | 43,55   | 5,18    | 8,20   | 4,24   | 90,21   | 98,90  |
| IL6      | 885,22 | 954,83 | 917,92  | 951,11  | 974,53  | 990,00  | 875,02  | 853,31 | 812,09 | 912,67  | 60,10  |

B

| CYTOKINE | D1      | D2      | D3      | D4      | D5      | D6      | D7      | D8      | D9      | MW      | SD     |
|----------|---------|---------|---------|---------|---------|---------|---------|---------|---------|---------|--------|
| ELA      | 4087,02 | 3703,80 | 3686,98 | 4079,58 | 4202,79 | 4206,02 | 2421,23 | 2361,41 | 2373,37 | 3458,02 | 826,35 |
| TGF      | 290,98  | 292,35  | 277,04  | 303,54  | 302,92  | 312,87  | 458,20  | 449,44  | 351,28  | 337,62  | 69,01  |
| IL10     | 77,58   | 76,69   | 103,77  | 77,80   | 95,57   | 80,27   | 73,36   | 68,74   | 66,85   | 80,07   | 12,10  |
| IL4      | 89,63   | 90,18   | 89,48   | 88,23   | 89,12   | 90,97   | 91,24   | 90,23   | 91,98   | 90,11   | 1,15   |
| VEGF     | 19,41   | 19,26   | 19,09   | 17,14   | 17,10   | 17,14   | 15,82   | 15,82   | 15,81   | 17,39   | 1,50   |
| TNF      | 349,86  | 334,19  | 324,32  | 242,44  | 243,83  | 247,38  | 3,42    | 4,35    | 2,48    | 194,69  | 148,98 |
| IL15     | 25,72   | 25,19   | 25,43   | 25,46   | 25,70   | 25,53   | 25,50   | 25,64   | 25,28   | 25,49   | 0,18   |
| IL1      | 161,21  | 193,14  | 197,58  | 87,74   | 87,58   | 96,02   | 5,29    | 8,30    | 7,33    | 93,79   | 77,36  |
| IL6      | 1043,17 | 1060,36 | 1164,58 | 841,18  | 851,56  | 915,87  | 899,32  | 903,24  | 898,23  | 953,05  | 110,08 |
